# Supplementary material for: High-efficiency SERS platform based on 3D porous PPDA@Au NPs as a substrate for the detection of pesticides on vegetables
Source: Royal Society of Chemistry journal article supplement (doi:10.1039/d3ay00808h), 2023-01-01
Supplement: d3ay00808h1.pdf [file d3ay00808h1.pdf]

## Supplement

### **A high efficiency SERS platform based on 3D porous PPDA@Au NPs as substrate for detection of pesticide on vegetables**

Zhiyou Zeng<sup>1</sup>, Xiaoyu Yang<sup>1</sup>, Yongguo Cao, Sanshan Pu, Yinyu Zhou, Rongli Gu,  
Yiqian Zhang, Caijun Wu\*, Xiaojun Luo\*, Yi He\*

---

\* Corresponding author.

<sup>1</sup> Zhiyou Zeng and Xiaoyu Yang contributed equally to this work.

E-mail address: [heyi04191@163.com](mailto:heyi04191@163.com); [wcyj452947@163.com](mailto:wcyj452947@163.com); [xajunluo@hotmail.com](mailto:xajunluo@hotmail.com).

1. The Raman spectrum of TB

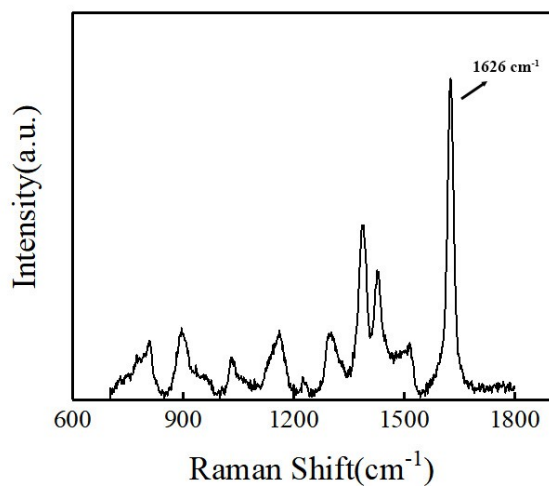

Figure S1. The Raman spectrum of TB.

2. The storage stability of the proposed PPDA@Au NPs SERS platform.

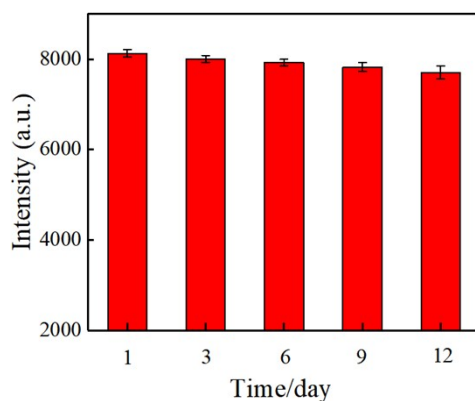

Figure S2. The storage stability of the proposed PPDA@Au NPs SERS platform.

3. Table S1. Comparison with literature for 2,4-D study by SERS and other methods.

| Detection method                       | Real sample   | recovery      | Reference |
|----------------------------------------|---------------|---------------|-----------|
| High-performance liquid chromatography | Water samples | 95.58%-115%   | 1         |
| SERS                                   | Tea           | 103.3%-111.1% | 2         |
| Spectrophotometric                     | Mineral water | 96%-113%      | 3         |
| electrochemical impedance spectroscopy | toothpaste    | 98.8%-107%    | 4         |

**Reference**

40. N. Orooji, A. Takdastan, R.J. Yengejeh, S. Jorfi, A.H. Davami, A quick and inexpensive method to determine 2, 4-dichlorophenoxyacetic acid residues in water samples by HPLC, *Desalin. Water Treat.* 2021, **217**, 329-338.
41. M. M. Hassan, T. Jiao, W. Ahmad, X. Yi, M. Zareef, S. Ali, H. Li, Q. Chen, Cellulose paper-based SERS sensor for sensitive detection of 2, 4-D residue levels in tea coupled uninformative variable elimination-partial least squares, *Spectromchim. Acta Part A Mol. Biomol. Spectrosc.* 2021, **248**, 119198.
42. Z.A. Kormosh, E.S. Zhurba, I.P. Antal, A.Z. Kormosh, Y.R. Bazel, Spectrophotometric determination of 2, 4-dichlorophenoxyacetic acid using extraction with astrafloxin, *J. Anal. Chem.* 2020, **75**, 909-912.
43. F. Liu, Q. Xu, W. Huang, Z. Zhang, G. Xiang, C. Zhang, C. Liang, H. Lian, J. Peng, Green synthesis of porous graphene and its application for sensitive detection of hydrogen peroxide and 2,4-dichlorophenoxyacetic acid, *Electrochim. Acta* 2019, **295**, 615-623.
